### Time interval from left ventricular stimulation to QRS onset is a predictor of mortality in patients with cardiac resynchronization therapy

D. Yagishita, Y. Yagishita, S. Kataoka, K. Yazaki, M. Kanai, S. Higuchi, K. Ejima, M. Shoda, N. Hagiwara

Tokyo Women's Medical University, Department of Cardiology, Tokyo, Japan

**Funding Acknowledgement:** Type of funding source: None

**Introduction:** In our previous report, the time interval from left ventricular (LV) pacing to the earliest onset of QRS (S-QRS interval) has been found to be an independent predictor of mechanical response to cardiac resynchronization therapy (CRT). The S-QRS interval may indicate the conduction disturbance relevant to the localized tissue property such as scar or fibrotic lesion. Therefore, S-QRS interval longer than 37ms was associated with poor response to CRT, and proposed as suboptimal LV lead position. Then, we hypothesized that the longer S-QRS interval at the LV pacing site could be related to long term mortality and heart failure events in patients with CRT.

**Methods:** This retrospective study included 82 consecutive heart failure patients with sinus rhythm, reduced LV ejection fraction ( $\leq 35\%$ ), and a wide QRS complex ( $\geq 120\text{ms}$ ), who undergone CRT implantation between 2012 January and 2017 December. Patients were divided into Short S-QRS group ( $< 37\text{ms}$ , SS-QRS) and Long S-QRS group ( $\geq 37\text{ms}$ , LS-QRS) according to the previously reported optimal cut off value. A responder was defined as one with  $\geq 15\%$  reduction in LV end-systolic volume assessed by echocardiography at 6 months after CRT. The primary endpoint was total mortality, which included LV assist device implantation or heart transplantation. The secondary endpoints included the composite endpoint of total mortality or heart failure hospitalization.

**Results:** The study patients were divided into SS-QRS (N=43, age  $65.9 \pm 13.2$  years, 77% male) and LS-QRS (N=39, age  $63.0 \pm 13.4$ , 85% male). In the electrocardiographic measurements, there were no significant differences in baseline QRS duration ( $162.4 \pm 30.3\text{ms}$  in SS-QRS vs.  $154.5 \pm 31.6\text{ms}$  in LS-QRS,  $P=0.19$ ) and LV local activation time assessed as Q-LV interval ( $118.3 \pm 34.3\text{ms}$  in SS-QRS vs.  $115.3 \pm 32.0\text{ms}$  in LS-QRS,  $P=0.71$ ). S-QRS interval was  $25.9 \pm 5.3\text{ms}$  in SS-QRS and  $51.5 \pm 13.7\text{ms}$  in LS-QRS ( $P < 0.01$ ), and the responder rate was significantly higher in SS-QRS compared with LS-QRS (79% vs. 29%,  $P < 0.01$ ). During mean follow up of  $47.7 \pm 22.4$  months, 24 patients (29%) reached to the primary endpoint, while the secondary endpoints were observed in 47 patients (57%). LS-QRS patients had significantly worse event-free survival for both primary and secondary endpoints (Figure). After the multivariate Cox regression analysis, LS-QRS ( $\geq 37\text{ms}$ ) was an independent predictor of total mortality (HR=2.6, 95% CI: 1.11 to 6.12,  $P=0.03$ ) and the secondary composite events (HR=2.4, 95% CI: 1.31 to 4.33,  $P < 0.01$ ).

**Conclusion:** The S-QRS interval longer than 37ms, which may reflect the conduction disturbance relevant to the scar or fibrotic lesion at the LV pacing site, was a significant predictor of the total mortality and heart failure hospitalization. These findings have implications for the optimal LV lead placement in patients with CRT device.

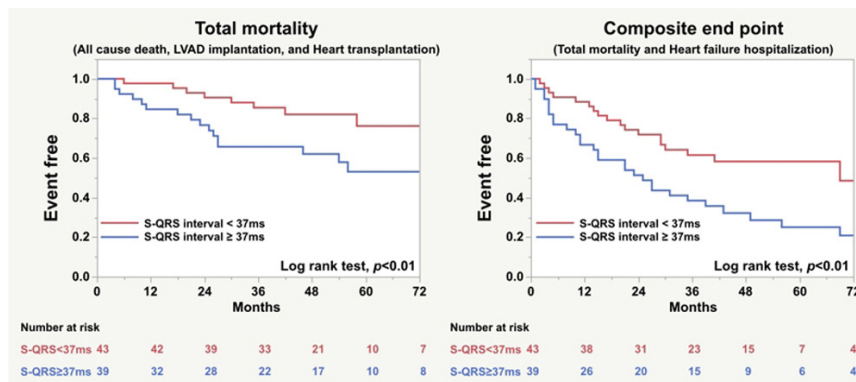

Clinical outcomes according to S-QRS

Downloaded from https://academic.oup.com/eurheartj/article/41/Supplement\_2/ehaa946.0806/6002598 by guest on 24 April 2024
